# Supplementary material
Source: PubMed Central journal article supplement (PMC6103222)
Supplement: NIHMS980556-supplement-8.pdf [file NIHMS980556-supplement-8.pdf]

**Table S1. Statistics for crystallographic analyses – Related to Figure 2.**

|                                                    | Rtt109                                        | Rtt109-Asf1-H3-H4      | Rtt109-Asf1-H3-H4-CoA  |
|----------------------------------------------------|-----------------------------------------------|------------------------|------------------------|
| <b>Data collection</b>                             |                                               |                        |                        |
| Wavelength (Å)                                     | 0.9786                                        | 0.9788                 | 0.9785                 |
| Space group                                        | P2 <sub>1</sub> 2 <sub>1</sub> 2 <sub>1</sub> | P6 <sub>5</sub> 22     | P6 <sub>5</sub> 22     |
| Cell dimensions                                    |                                               |                        |                        |
| a, b, c (Å)                                        | 81.18, 92.02, 98.37                           | 112.25, 112.25, 333.05 | 111.90, 111.90, 332.71 |
| α, β, γ (°)                                        | 90, 90, 90                                    | 90, 90, 120            | 90, 90, 120            |
| Resolution (Å)                                     | 50.00-2.50 (2.59-2.50)                        | 50.00-3.60 (3.73-3.60) | 50.00-3.50 (3.63-3.50) |
| R <sub>merge</sub>                                 | 0.140 (0.726)                                 | 0.249 (0.831)          | 0.177 (0.527)          |
| R <sub>pim</sub>                                   | 0.057 (0.290)                                 | 0.058 (0.195)          | 0.080 (0.240)          |
| I / σI                                             | 13.6 (2.7)                                    | 14.6 (4.7)             | 8.8 (2.5)              |
| CC <sub>1/2</sub> for the highest resolution shell | 0.800                                         | 0.938                  | 0.777                  |
| Completeness (%)                                   | 100.0 (100.0)                                 | 99.9 (99.9)            | 99.5 (99.7)            |
| Redundancy                                         | 6.9 (7.1)                                     | 18.9 (19.1)            | 5.2 (5.4)              |
| Total/Unique reflections                           | 179906/26067                                  | 289958/15314           | 84699/16416            |
| <b>Refinement</b>                                  |                                               |                        |                        |
| Resolution (Å)                                     | 50.00-2.50 (2.60-2.50)                        | 50.00-3.60 (3.83-3.60) | 50.00-3.50 (3.72-3.50) |
| No. reflections                                    | 25943 (2744)                                  | 15148 (2440)           | 16286 (2634)           |
| R <sub>work</sub> / R <sub>free</sub> (%)          | 16.6(23.3)/20.9(28.8)                         | 21.4(29.3)/26.4(30.9)  | 24.3(30.4)/29.5(33.9)  |
| No. atoms                                          |                                               |                        |                        |
| Protein                                            | 3178                                          | 5468                   | 5449                   |
| Ligand/Ion                                         | 6                                             | 36                     | 85                     |
| Waters                                             | 195                                           |                        |                        |
| B-factors (Å <sup>2</sup> )                        |                                               |                        |                        |
| Protein                                            | 41.0                                          | 56.6                   | 65.8                   |
| Ligand/Ion                                         | 28.3                                          | 60.0                   | 68.7                   |
| Waters                                             | 40.4                                          |                        |                        |
| R.m.s deviations                                   |                                               |                        |                        |
| Bond lengths (Å)                                   | 0.005                                         | 0.003                  | 0.003                  |
| Bond angles (°)                                    | 0.846                                         | 0.612                  | 0.496                  |
| Ramachandran plot                                  |                                               |                        |                        |
| Favored                                            | 97.2%                                         | 96.7%                  | 96.3%                  |
| Allowed                                            | 2.8%                                          | 3.3%                   | 3.7%                   |
| Outliers                                           | 0                                             | 0                      | 0                      |

\* Numbers in parentheses indicate values in the highest resolution shell.
