# Supplementary material
Source: PubMed Central journal article supplement (PMC6103222)
Supplement: NIHMS980556-supplement-9.pdf [file NIHMS980556-supplement-9.pdf]

**Table S2. List of yeast strains – Related to Figures 4, 6 and 7.**

| <b>Name</b>    | <b>Genetic background</b>                                       | <b>Reference</b>     |
|----------------|-----------------------------------------------------------------|----------------------|
| <b>W303-1A</b> | <i>MATa leu2-3, 112 ura3-1 his3-11, trp1-1, ade2-1 can1-100</i> | (Lisby et al., 2001) |
| <b>ZGY354</b>  | W303-1A <i>asf1::kanMx6 URA3-VIIL</i>                           | (Han et al., 2007a)  |
| <b>ZGY593</b>  | W303-1B <i>Rad52-YFP hht1-hhf1::LEU2 hht2-hhf2::kanMX6</i>      | This study           |
| <b>ZGY908</b>  | W303-1A <i>rtt109::kanMx6</i>                                   | (Han et al., 2007a)  |
| <b>ZGY1014</b> | W303-1A <i>rtt109::kanMx6 Rad52-YFP</i>                         | This study           |
| <b>ZGY1321</b> | W303-1A <i>rtt109::kanMx6 hht1-hhf1::LEU2 hht2-hhf2::kanMX6</i> | This study           |
| <b>ZGY2250</b> | W303-1A <i>hht1-hhf1::LEU2 hht2-hhf2::kanMX6</i>                | This study           |
| <b>ZGY3403</b> | W303-1B <i>asf1::kanMx6 URA3-VIIL Rad52-YFP</i>                 | This study           |
