# Supplementary material
Source: PubMed Central journal article supplement (PMC6103222)
Supplement: NIHMS980556-supplement-10.pdf [file NIHMS980556-supplement-10.pdf]

**Table S3. List of mutagenesis – Related to Figures 1, 4, 6 and 7.**

| <b>Mutagenesis</b>             | <b>Primers</b>                                                                                                           |
|--------------------------------|--------------------------------------------------------------------------------------------------------------------------|
| <i>ScAsf1</i><br>V146P/T147P   | F:CTGGCTGAAAAGCCAAGGCCACCAAGGTTTAAACATTGTTTGGGATA<br>ATG<br>R:CATTATCCCAAACAATGTAAACCTTGGTGGCCTTGGCTTTTCAGCC<br>AG       |
| <i>ScAsf1</i> R148E            | F:GCTGAAAAGCCAAGGGTAACAGAGTTTAAACATTGTTTGGGATAATG<br>R:CATTATCCCAAACAATGTAAACTCTGTTACCCTTGGCTTTTCAGC                     |
| <i>AfAsf1</i><br>V146P/T147P   | F: GCTGAGAAGCCGAGACCGCCAGGTTTCGCTATCAAG<br>R: CTTGATAGCGAACCTGGGCGGTCTCGGCTTCTCAGC                                       |
| <i>AfAsf1</i> R148E            | F: AAGCCGAGAGTGACCGAGTTTCGCTATCAAGTGG<br>R: CCACTTGATAGCGAACTCGGTCACTCTCGGCTT                                            |
| <i>ScH3</i> S57E               | F:GAGAAATTAGAAGATTCCAAAAAGAGACTGAACTGTTGATCAGAA<br>AGTTACC<br>R:GGTAACTTTCTGATCAACAGTTCAGTCTCTTTTTTGAATCTTCTAAT<br>TTCTC |
| <i>ScH3</i> S57K               | F:GAGAAATTAGAAGATTCCAAAAAAGACTGAACTGTTGATCAGAA<br>AGTTACC<br>R:GGTAACTTTCTGATCAACAGTTCAGTCTTTTTTTTGAATCTTCTAAT<br>TTCTC  |
| <i>ScH3</i> E94R               | F:CTTCTGCTATCGGTGCTTTGCAACGATCCGTCGAAGCATACTTAGTC<br>R:GACTAAGTATGCTTCGACGGATCGTTGCAAAGCACCGATAGCAGAA<br>G               |
| <i>ScH4</i> R95D               | F:GTTGTTTATGCTTTGAAGAGACAAGGTGATACCTTATATGGTTTCGG<br>TGG<br>R:CCACCGAAACCATATAAGGTATCACCTTGTCTCTTCAAAGCATAAA<br>CAAC     |
| <i>ScH4</i> Δ95-C              | F:GCTTTGAAGAGACAAGGTTGAACCTTATATGGTTTCGGTGG<br>R:CCACCGAAACCATATAAGGTTCAACCTTGTCTCTTCAAAGC                               |
| <i>AfRtt109</i> R265E          | F: GATGATCCCAAGACAGAGTTTCTGATCGACCTG<br>R: CAGGTCGATCAGAACTCTGTCTTGGGATCATC                                              |
| <i>AfRtt109</i> R306E          | F: GAGATGATGTCCTTTGAACAGGAATGTTCCGGCC<br>R: GGCCGAACATTCTGTTCAAAGGACATCATCTC                                             |
| <i>ScRtt109</i><br>R194A/Q198A | F:CCAAAATTTGTTTATTTACTGCACCTGCATCCGCGTACCTCTTCCCA<br>GATTC<br>R:GAATCTGGGAAGAGGTACGCGGATGCAGGTGCAGTAAATAAACAA<br>ATTTGG  |
| <i>ScRtt109</i><br>D248R       | F:CAAAATTAAGGATACCGGGCGAACGTCCTGCTCGAGTAAGATCATA<br>C<br>R:GTATGATCTTACTCGAGCAGGACGTTTCGCCGGTATCCTTAATTTTG               |
| <i>ScRtt109</i> R292E          | F:CCCAGACGATCCTAAGGCTGAATTTATACACCAATTGGCAGAGG<br>R:CCTCTGCCAATTGGTGTATAAATTCAGCCTTAGGATCGTCTGGG                         |
| <i>ScRtt109</i> R318E          | F:CCTTCTGGATTGAACTACAAGAGGAGCAAGAGTTCAAATTAAGTGT<br>C<br>R:GACACTTAATTTGAACTCTTGCTCCTTGTAGTTCAATCCAGAAGG                 |
| <i>ScRtt109</i><br>Q319A       | F:GGATTGAACTACAAGAGCGTGCAGAGTTCAAATTAAGTGTCACATC<br>R:GATGTGACACTTAATTTGAACTCTGCACGCTTGTAGTTCAATCC                       |
| <i>ScRtt109</i><br>E369A       | F:CAAGAAGTACATTACTGGAGAGGCATACGATACAGAGGAAGGCGC<br>R:GCGCCTTCTCTGTATCGTATGCCTCTCCAGTAATGTACTTCTTG                        |
